# Supplementary material for: A facile fabrication of upconversion luminescent and mesoporous core–shell structured β-NaYF4:Yb3+, Er3+@mSiO2nanocomposite spheres for anti-cancer drug delivery and cell imaging
Source: Royal Society of Chemistry journal article supplement (doi:10.1039/c2bm00087c), 2012-10-17
Supplement: c2bm00087c.pdf [file c2bm00087c.pdf]

## **Electronic Supplementary Information (ESI)**

### **A facile fabrication of upconversion luminescent and mesoporous core/shell structured $\beta$ -NaYF<sub>4</sub>:Yb<sup>3+</sup>, Er<sup>3+</sup>@mSiO<sub>2</sub> nanocomposite spheres for anti-cancer drug delivery and cell imaging**

**Chunxia Li, Zhiyao Hou, Yunlu Dai, Dongmei Yang, Ziyong Cheng, Ping'an Ma\* and Jun Lin\***

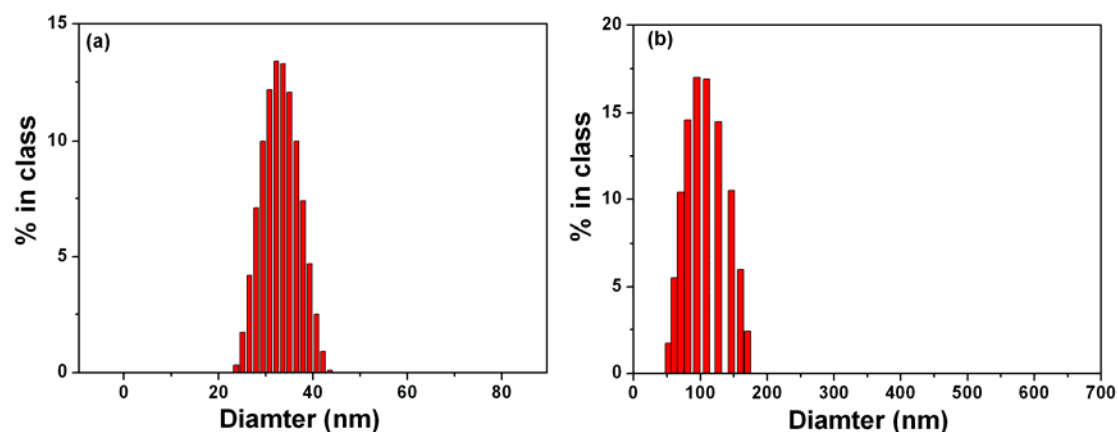

**Figure S1** The size distribution of  $\beta$ -NaYF<sub>4</sub>:Er<sup>3+</sup>/Yb<sup>3+</sup> core (a) and core-shell structured  $\beta$ -NaYF<sub>4</sub>:Er<sup>3+</sup>/Yb<sup>3+</sup>@mSiO<sub>2</sub> (b) by dynamic light scattering.

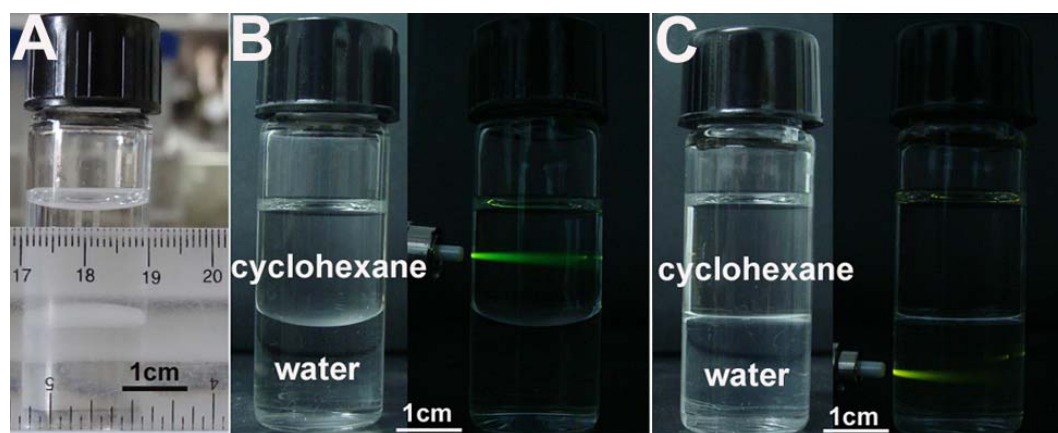

**Figure S2** The digital photograph (A) of UCNPs dispersed in cyclohexane under daylight with a ruler. And other digital photographs and luminescence photographs dispersed in cyclohexane (B) and water (C) were obtained using the same magnification and bottles.

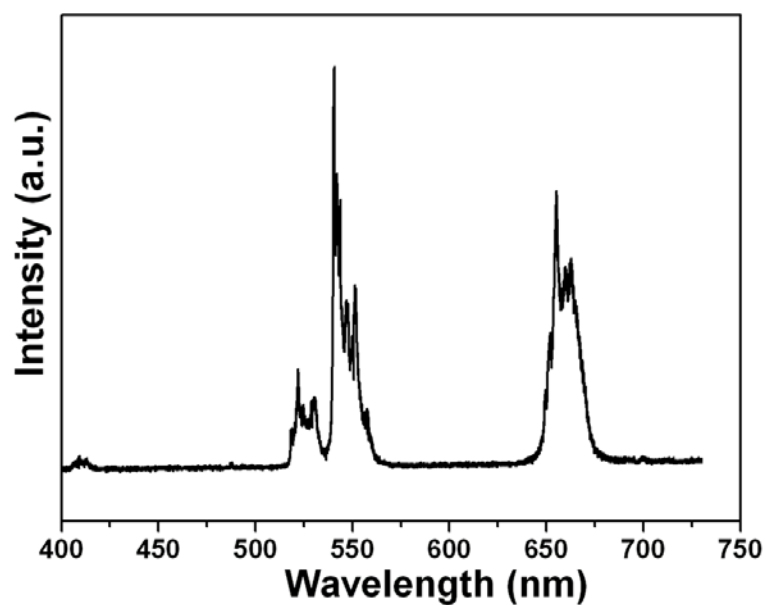

**Figure S3** The upconversion emission spectrum of UCNPs@mSiO<sub>2</sub> nanoparticles dispersed in water.

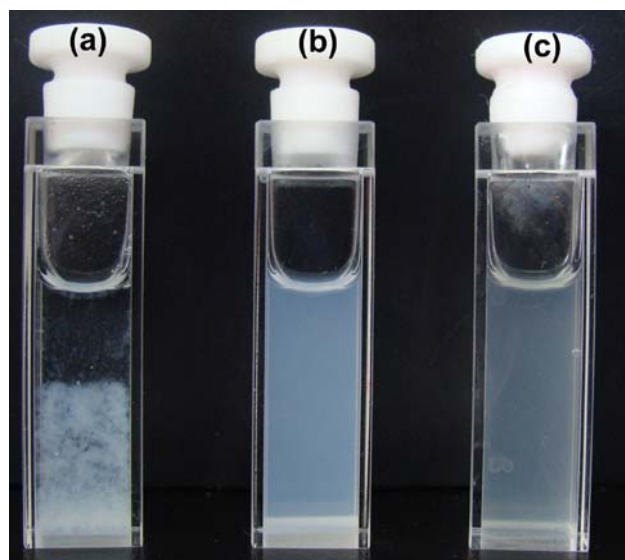

**Figure S4** the digital photographs of UCNPs@mSiO<sub>2</sub> (a), UCNPs@mSiO<sub>2</sub>-PEG (b), and UCNPs@mSiO<sub>2</sub>-PEG/FA (c) dispersed in water.

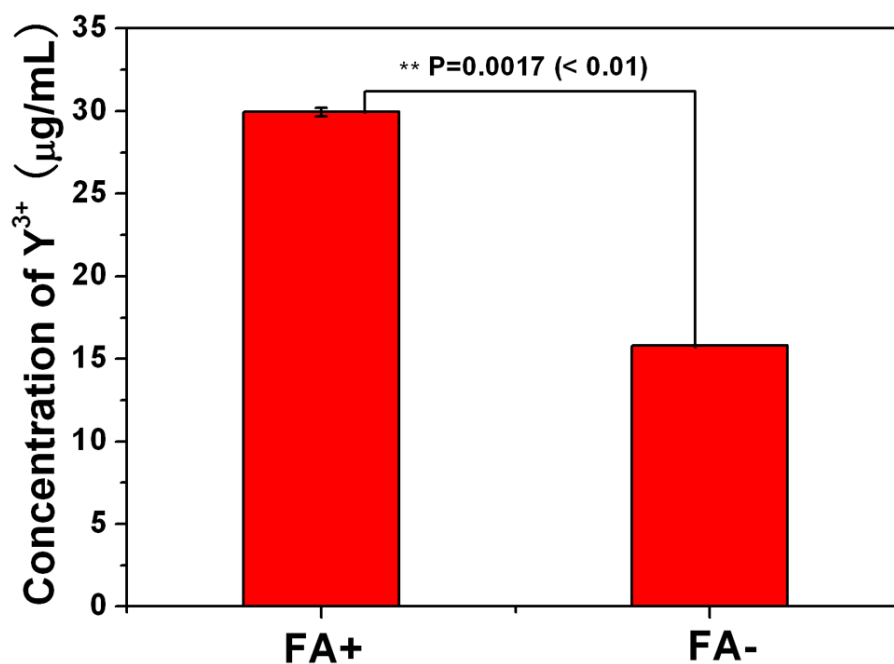

**Figure S5** The concentration of Y<sup>3+</sup> internalized in HeLa cells measured by ICP-OES technique after incubated with UCNPs@mSiO<sub>2</sub>-PEG/FA (FA+) and UCNPs@mSiO<sub>2</sub>-PEG (FA-).
